# Supplementary material for: Fluorescent Au nanoclusters stabilized by silane: facile synthesis, color-tunability and photocatalytic properties
Source: Royal Society of Chemistry journal article supplement (doi:10.1039/c7nr01052d), 2017-01-01
Supplement: c7nr01052d1.pdf [file c7nr01052d1.pdf]

### Supporting Information

## Fluorescent Au Nanoclusters Stabilized by Silane: Facile Synthesis, Color-tunability and Their Photocatalytic Properties

Shaochen Zhou,<sup>1,2</sup> Yanyan Duan,<sup>1,2</sup> Fu Wang<sup>1,\*</sup> and Chuanyi Wang<sup>1,\*</sup>

Laboratory of Environmental Sciences and Technology, Xinjiang Technical Institute of Physics & Chemistry; Key Laboratory of Functional Materials and Devices for Special Environments, Chinese Academy of Sciences, Urumqi, Xinjiang 830011, China

<sup>2</sup>University of Chinese Academy of Sciences, Beijing 100049, China

\* Corresponding author. Email: [cywang@ms.xjb.ac.cn](mailto:cywang@ms.xjb.ac.cn) and [wangfu@ms.xjb.ac.cn](mailto:wangfu@ms.xjb.ac.cn)

Table 1. Maximum excitation and emission wavelengths ( $\lambda_{ex}/\lambda_{em}$ ), as well as emission color of Au NCs synthesized with different volume ratios of HAuCl<sub>4</sub> solution (0.01 M) versus MPTS and THF

| HAuCl <sub>4</sub> : MPTS: THF (Volume ratio) | $\lambda_{ex}/\lambda_{em}$ (nm) | Emission color  |
|-----------------------------------------------|----------------------------------|-----------------|
| 10:500:0                                      | 460/538                          | Greenish yellow |
| 10:400:100                                    | 346/542                          | Pale yellow     |
| 10:300:200                                    | 354/547                          | Yellow          |
| 10:200:300                                    | 394/550                          | Yellow          |
| 10:100:400                                    | 442/554                          | Orange yellow   |
| 10:10: 490                                    | 430/558                          | Orange          |
| 500:10:0                                      | 435/568                          | Orange          |
| 500:20:0                                      | 441/574                          | Orange red      |
| 500:30:0                                      | 445/580                          | Orange red      |

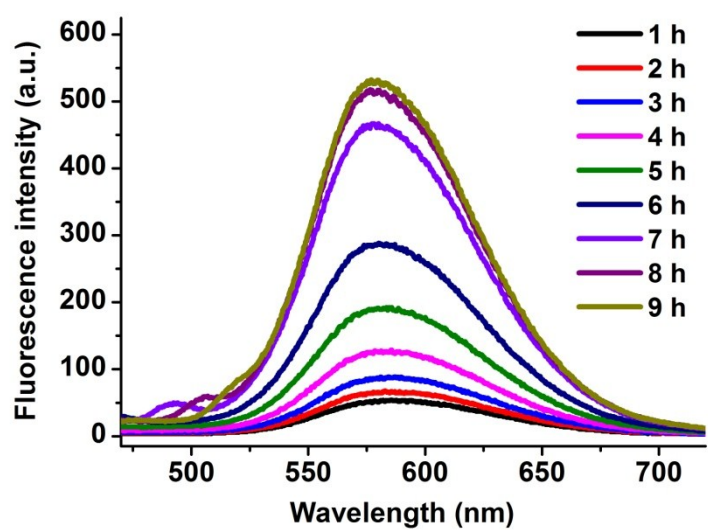

Figure S1. Fluorescence spectra of Au NCs recorded at different reaction time.

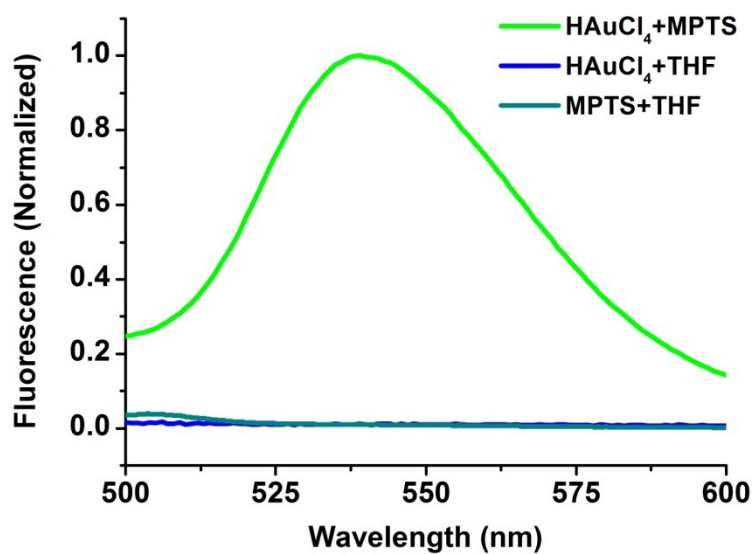

Figure S2. Fluorescence spectra of  $\text{HAuCl}_4$ +MPTS,  $\text{HAuCl}_4$ +THF and MPTS+THF systems after UV irradiation for 8 hours (excitation wavelength: 440 nm).

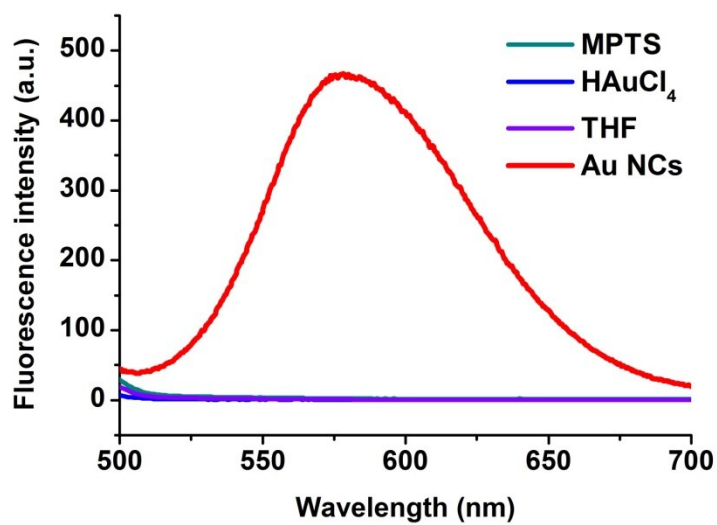

Figure S3. Fluorescence spectra of MPTS, H<sub>2</sub>AuCl<sub>4</sub>, THF and Au NCs under excitation at 440 nm.

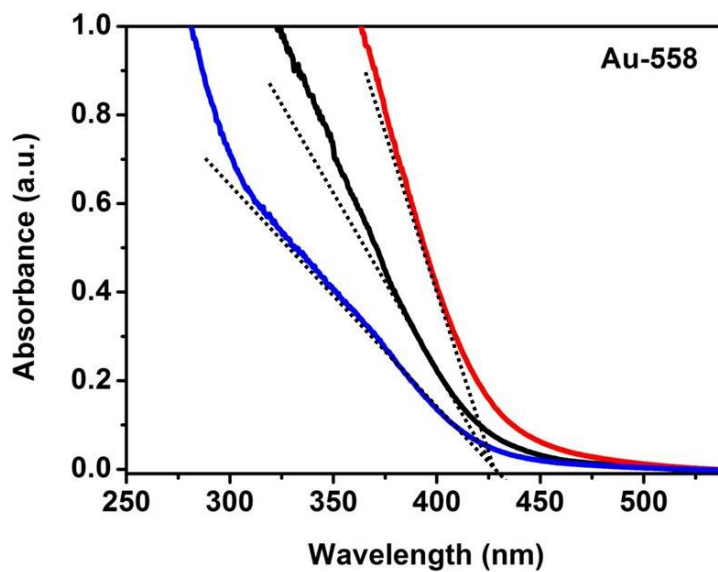

Figure S4. UV-vis absorption spectra of Au-558 recorded at different concentrations of Au-558 in THF.

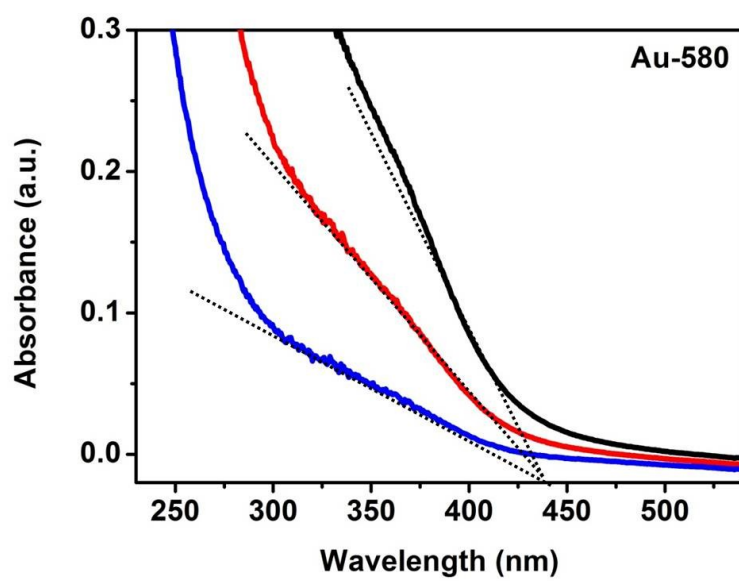

Figure S5. UV-vis absorption spectra of Au-580 recorded at different concentrations of Au-580 in THF

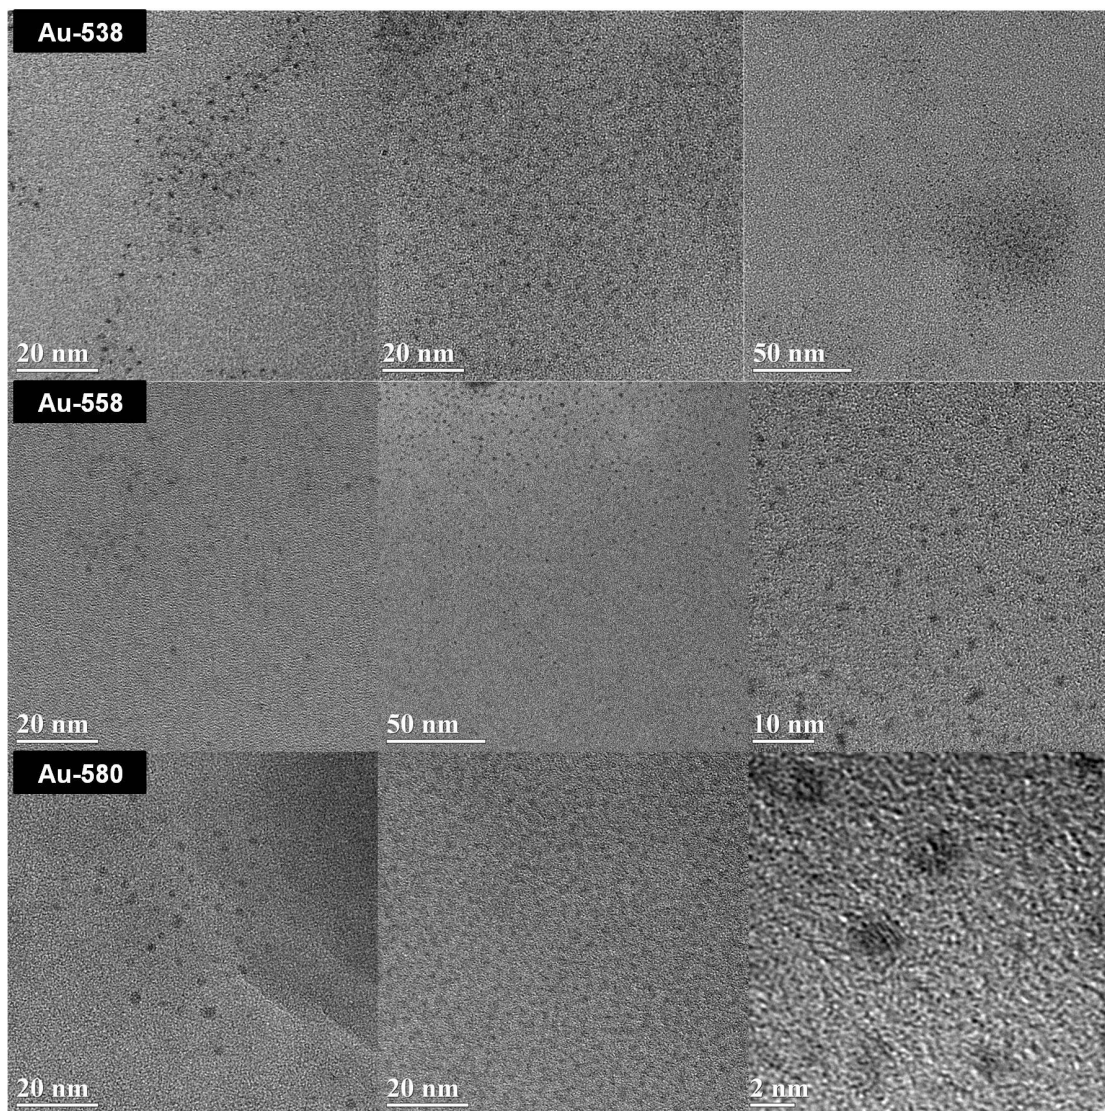

Figure S6. HR-TEM images of Au-538 (up), 558 (middle) and 580 (down) in different scale bars.

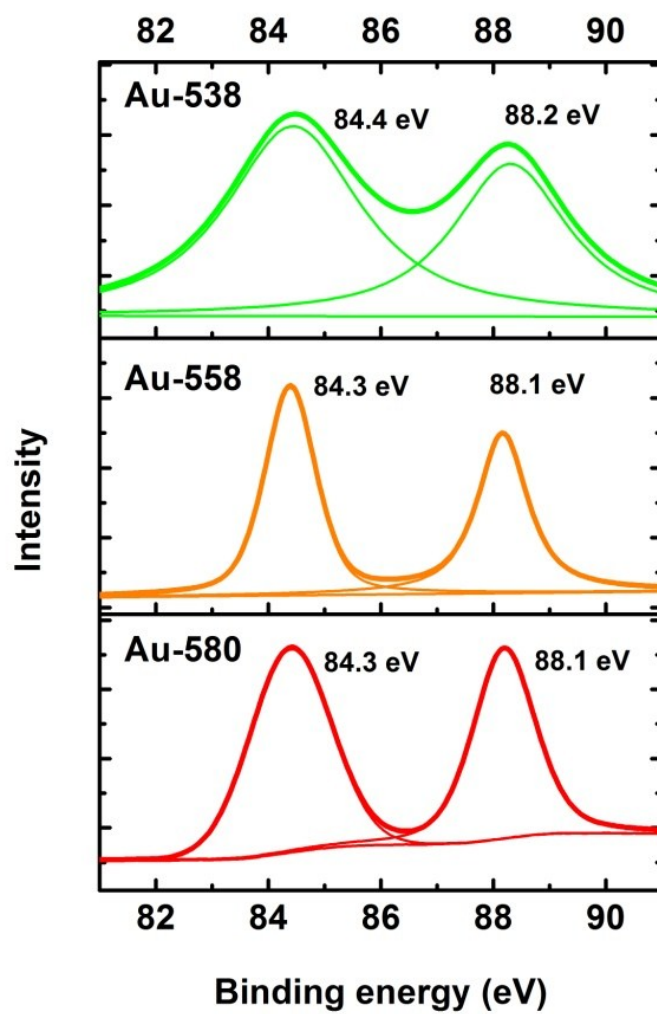

Figure S7. XPS spectra of Au 4f from Au-538,558 and 580. Binding energies of Au 4f from these samples are generally around 84.3 eV for Au  $4f_{7/2}$ , and 88.1 eV for  $4f_{5/2}$ .

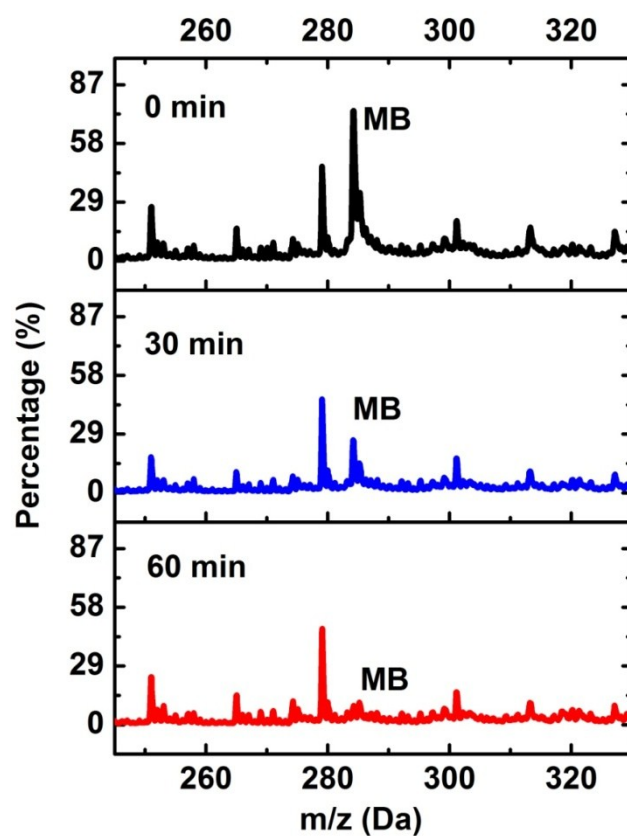

Figure S8. ESI-MS spectra of Au NCs-MB system after UV irradiation of 0, 30 and 60 minutes, respectively.

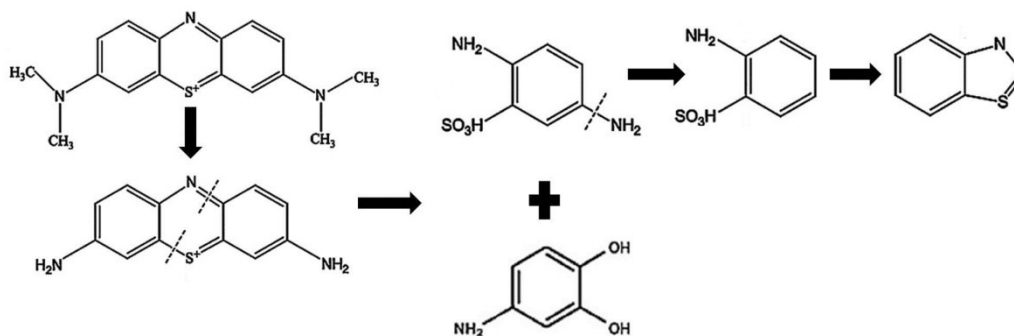

Figure S9. Possible degrading process of MB in the presence of Au NCs according to the ESI-MS results.

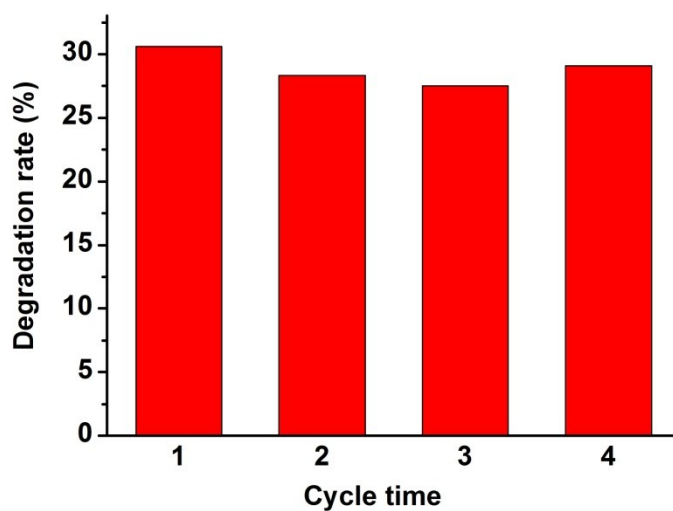

Figure S10. Cyclic test of Au NCs@glass's catalytic performance in degradation of MB under visible light.

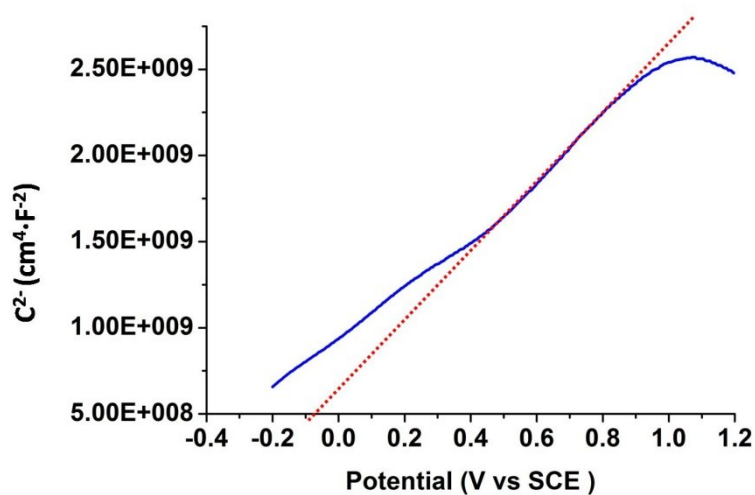

Figure S11. Mott-Schottky plots of Au NCs using saturated calomel electrode (SCE) as the reference. The intercept of tangent line at the potential axis is approximately  $0.8V_{SCE}$ , which equals to 0.161 V with respect to standard hydrogen electrode.



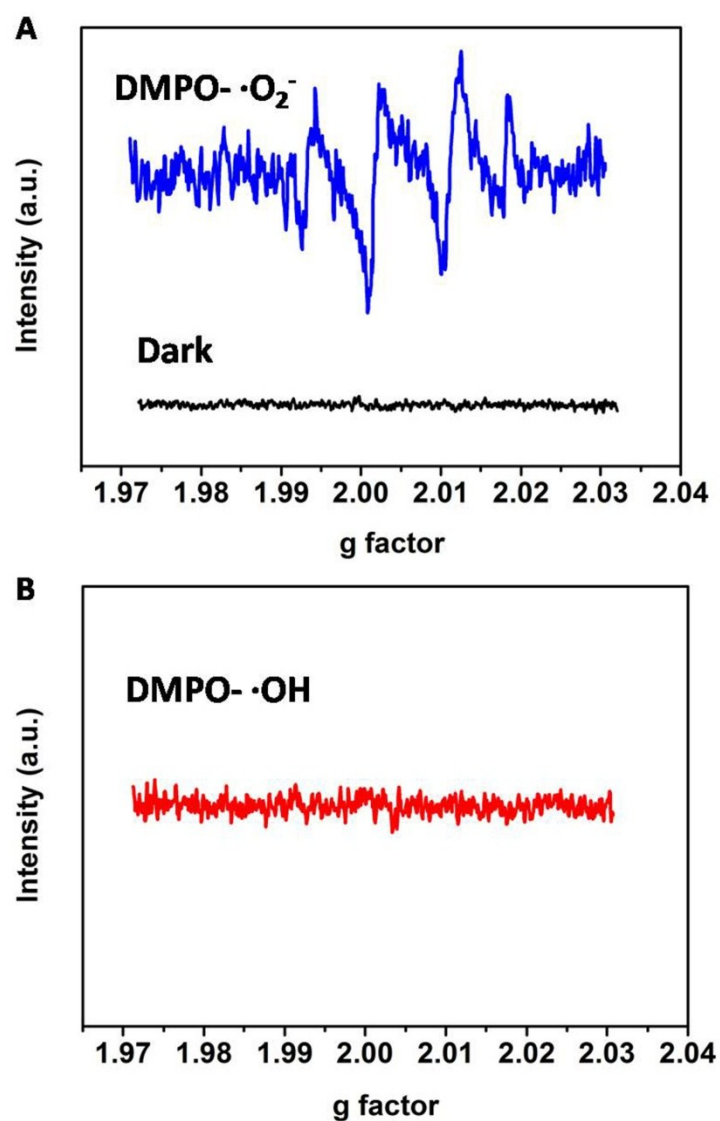

Figure S12. EPR results of the Au NCs-MB system. (A) Signal of superoxide radicals can be detected (blue line) under visible light irradiation ( $\lambda > 420$  nm), and there is no signal at all in the dark environment (black line) (B) Signals of hydroxyl radicals cannot be observed.

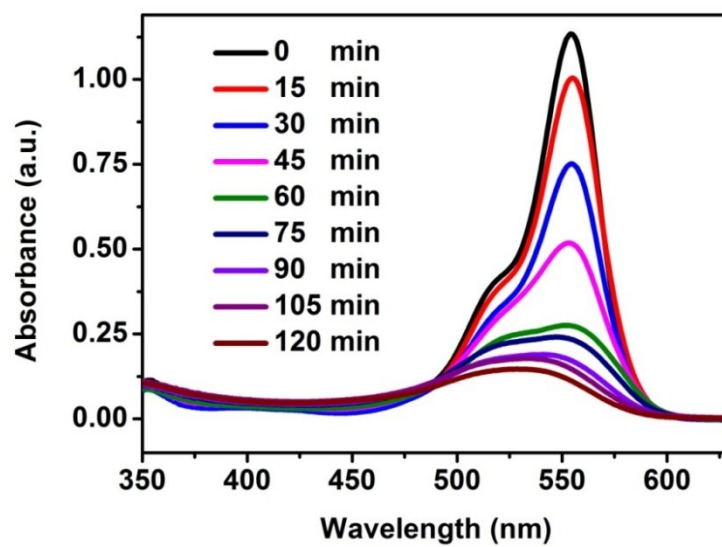

Figure S13. Degradation of Rhod B with Au NCs in water under visible light irradiation.
